# Supplementary material for: Genome-wide analysis of the lignin toolbox for morus and the roles of lignin related genes in response to zinc stress
Source: PeerJ. 2021 Aug 6;9:e11964. doi: 10.7717/peerj.11964 (PMC8351576; doi:10.7717/peerj.11964)
Supplement: Supplemental Information 7 [file peerj-09-11964-s007.xlsx]

## Sheet: Sheet1
	Table S1 Genome-wide screening of monolignon biosynthesis pathway-related genes
Symbols	ID	Evalue_Full	Score_Full	Bias_Full	Evalue_Best	Score_Best	Bias_Best	Domain_exp	Domain_N	Root	bark	winter-bud	male flower	leaf		L0	S0	R0
Mn4CL1	L484_005683.p01	3.3e-302	1003.3	0	3.9e-302	1003.1	0	1	1	66.887	27.283	4.1	10.564	17.484	Fc4CL1	8.63093	298.126	90.3985
Mn4CL2	L484_001358.p01	2.9e-293	973.8	0	3.3e-293	973.7	0	1	1	101.969	161.877	23.411	29.879	103.587	Fc4CL2	6.82083	238.917	74.7133
Mn4CL3	L484_019687.p01	8.2e-280	929.4	0	1.4e-279	928.6	0	1.3	1	336.616	202.739	3.914	70.766	107.022	Fc4CL3	11.1392	11.0031	61.0914
Mn4CL4	L484_009217.p01	5.6e-199	662.6	0	6.6e-199	662.4	0	1	1	3.851	9.371	0.999	0.439	2.161	Fc4CL4	1.6228	91.4951	29.0015
Mn4CL5	L484_020607.p01	3.6e-171	570.8	0	4.5e-171	570.5	0	1.1	1	27.109	57.945	12.43	65.592	31.722	Fc4CL5	44.6425	43.8815	41.3454
Mn4CL6	L484_002716.p01	9.3e-157	523.2	0	1e-156	523.1	0	1	1	2.047	0.677	5.091	40.793	12.445	Fc4CL6	4.6546	0.4737	0.0583667
MnC3H1	L484_027871.p01	0	1023.3	0	0	1023.1	0	1	1	162.361	316.762	225.629	295.833	240.259	FcC3H1	54.9131	328.92	75.9595
MnC3H2	L484_005453.p01	3.2e-139	465.2	0	2e-94	317.4	0	2	2	2.795	18.269	NA	4.326	1.222	FcC3H2	3.243	6.50687	2.57547
MnC3H3	L484_023237.p01	3.5e-136	455.2	0	2.2e-94	317.2	0	2.2	2	NA	0.342	3.026	7.016	2.376	FcC3H3	20.0167	0.1819	0.00893333
MnC3H4	L484_009567.p01	1.1e-131	440.4	0	1.3e-131	440.1	0	1	1	329.218	365.411	7.904	212.392	174.898	FcC3H4	7.4151	24.2394	68.7496
MnC3H5	L484_004711.p01	4.1e-121	405.4	0	4.6e-121	405.3	0	1	1	30.15	56.342	31.898	252.811	40.115	FcC3H5	13.1221	41.4867	22.8314
MnC4H1	L484_018794.p01	0	1047.8	0.3	0	1047.7	0.3	1	1	794.49	305.105	131.874	367.262	560.863	FcC4H1	51.207	882.469	450.806
MnC4H2	L484_011257.p01	0	1045	0.1	0	1044.8	0.1	1	1	1214.93	458.641	87.313	254.787	442.923	FcC4H2	38.8841	326.992	121.83
MnC4H3	L484_008222.p01	7e-263	873.3	0.1	8.6e-263	873	0.1	1	1	232.703	92.243	24.197	1.947	0.663	FcC4H3	0.0431333	7.75723	9.67577
MnCAD1	L484_002333.p01	3.1e-190	632	0.8	4.2e-190	631.6	0.8	1	1	48.531	32.93	197.179	117.574	642.494	FcCAD1	8.27373	17.2454	14.3181
MnCAD2	L484_002334.p01	2.3e-189	629.1	0.4	2.9e-189	628.8	0.4	1	1	20.535	22.172	98.112	21.7	41.138	FcCAD2	44.5368	2.00997	0.130133
MnCAD3	L484_027025.p01	8.5e-189	627.3	4.2	9.4e-189	627.1	4.2	1	1	NA	NA	NA	NA	NA	FcCAD3	22.1408	600.54	308.194
MnCAD4	L484_027027.p01	8.5e-189	627.3	4.2	9.4e-189	627.1	4.2	1	1	NA	NA	NA	NA	NA	FcCAD4	27.1248	48.7218	44.1077
MnCAD5	L484_026731.p01	2.4e-179	596.2	0.2	2.6e-179	596	0.2	1	1	130.697	387.396	154.612	257.377	173.584	FcCAD5	34.17	2.20323	19.6062
MnCAD6	L484_016519.p01	2.1e-178	593.1	0.1	3e-178	592.6	0.1	1.2	1	5.9	5.349	20.789	50.025	18.325	FcCAD6	56.0758	3.37487	0.453267
MnCCoAOMT1	L484_027504.p01	2.4e-150	499.3	0	2.7e-150	499.1	0	1	1	740.796	392.053	37.99	333.649	158.383	FcCCoAOMT1	15.3137	648.989	115.097
MnCCoAOMT2	L484_027239.p01	1.2e-61	208.7	0.1	1.4e-61	208.6	0.1	1	1	2.104	1.895	NA	19.865	2.395	FcCCoAOMT2	12.6179	5.66167	4.5206
MnCCoAOMT3	L484_011340.p01	3.2e-45	155	0.3	2.7e-23	83.2	0.1	3.1	3	0.775	0.43	0.13	0.854	3.554	FcCCoAOMT3	2.72027	41.2828	19.3463
MnCCR1	L484_013511.p01	2.7e-211	701	0.1	3e-211	700.9	0.1	1	1	161.307	169.441	31.435	116.113	52.472	FcCCR1	50.4811	75.4222	63.5823
MnCCR2	L484_013509.p01	4e-194	644.6	1.1	3.6e-168	559.3	0.3	2	2	NA	0.074	NA	NA	NA	FcCCR2	0.0534	0.362833	0.303667
MnCCR3	L484_015311.p01	6.3e-114	380.9	0	6.9e-114	380.8	0	1	1	24.528	30.235	28.081	2.2	7.7	FcCCR3	119.511	30.2194	22.2201
MnCCR4	L484_015312.p01	7.3e-113	377.4	0	8.1e-113	377.3	0	1	1	66.018	91.575	42.399	22.67	21.467	FcCCR4	22.1654	17.4941	8.65327
MnCCR5	L484_015314.p01	8.9e-110	367.3	0	9.9e-110	367.1	0	1	1	165.794	348.517	148.05	131.679	18.391	FcCCR5	50.4811	75.4222	63.5823
MnCCR6	L484_015313.p01	2.9e-109	365.6	0.1	3.2e-109	365.4	0.1	1	1	15.715	11.223	3.058	9.288	0.615	FcCCR6
MnCCR7	L484_024803.p01	4.8e-103	345.1	0.3	5.4e-103	345	0.3	1	1	NA	1.85	2.294	0.693	NA	FcCCR7	19.9065	31.7879	9.012
MnCOMT1	L484_019617.p01	8.1e-161	535.3	7.1	5.8e-131	437.1	1.1	2	2	NA	NA	NA	0.098	NA	FcCOMT1	0	0.0127667	1.72443
MnCOMT2	L484_019621.p01	2.3e-151	504.3	0	2.6e-151	504	0	1	1	51.785	20.241	5.014	67.835	1.461	FcCOMT2	0.516967	1.24933	2.89417
MnCOMT3	L484_013036.p01	3.2e-151	503.8	0	3.9e-151	503.5	0	1	1	2.918	15.106	0.488	0.536	1.349	FcCOMT3	8.11203	6.6207	27.695
MnCOMT4	L484_002595.p01	4.4e-141	470.4	0.1	5.3e-141	470.2	0.1	1	1	372.65	83.662	1.208	10.772	52.538	FcCOMT4	26.6907	1043.9	181.517
MnCOMT5	L484_023433.p01	4.5e-134	447.4	0	5.4e-134	447.1	0	1	1	5.814	3.032	1.745	21.692	0.662	FcCOMT5	0.037	0.0511	4.26397
MnCOMT6	L484_019619.p01	3.6e-131	437.8	0.5	4.6e-131	437.5	0.5	1	1	NA	NA	NA	NA	NA	FcCOMT6	0	0.0127667	1.72443
MnCSE1	L484_003175.p01	8e-201	667	0.1	9.6e-201	666.7	0.1	1	1	93.706	29.568	5.422	21.264	42.872	FcCSE1	3.85257	206.424	41.8295
MnCSE2	L484_002466.p01	8.7e-84	282.3	0	9.6e-84	282.2	0	1	1	35.562	22.122	28.273	34.419	35.69	FcCSE2	4.30257	18.4169	17.7905
MnCSE3	L484_006197.p01	8.9e-60	203.4	0	1.2e-59	203	0	1	1	0.961	7.272	41.644	29.545	10.151
MnF5H1	L484_026726.p01	1.3e-295	981.3	0	1.4e-295	981.1	0	1	1	360.005	43.201	18.204	15.605	4.127	FcF5H1	2.05797	464.515	141.561
MnF5H2	L484_023237.p01	4.6e-163	544	0	4.8e-109	365.8	0	2.2	2	Na	0.342	3.026	7.016	2.376	FcF5H2	20.0167	0.1819	0.00893333
MnHCT1	L484_018077.p01	2.3e-259	861.3	0	2.7e-259	861	0	1	1	72.662	27.999	1.838	5.564	47.881	FcHCT1	9.55033	205.001	86.208
MnHCT2	L484_000457.p01	1.5e-232	772.9	0	1.6e-232	772.8	0	1	1	102.582	29.849	4.885	36.14	37.713	FcHCT2	20.7028	34.5984	33.2262
MnHCT3	L484_018078.p01	4.7e-217	721.8	0	5.4e-217	721.6	0	1	1	17.31	4.906	NA	4.271	6.216		NA	NA	NA
MnHCT4	L484_020391.p01	1.3e-216	720.3	0	1.7e-216	720	0	1	1	0.673	0.075	NA	0.36	0.226	FcHCT4	0.432633	2.19367	0.3304
MnHCT5	L484_017530.p01	2.9e-172	574.2	0	3.3e-172	574	0	1	1	NA	0.039	8.442	5.167	6.998	FcHCT5	22.8641	0.358633	0.0101333
MnHCT6	L484_017529.p01	2.5e-169	564.5	0	2.9e-169	564.4	0	1	1	NA	NA	4.488	6.106	1.797		NA	NA	NA
MnPAL1	L484_024371.p01	0	1517.2	1.9	0	1260.4	0	2	2	159.335	95.99	44.488	25.664	34.56		NA	NA	NA
MnPAL2	L484_024373.p01	0	1467	0.1	0	1466.7	0.1	1	1	372.159	162.558	76.352	112.119	266.475		NA	NA	NA
MnPAL3	L484_013052.p01	0	1300.1	0.1	0	1299.6	0.1	1.1	1	325.397	278.606	17.323	205.82	54.264	FcPAL3	7.21597	298.677	178.062
MnPAL4	L484_024372.p01	0	1170.3	0	0	1170.1	0	1	1	789.2	427.592	184.137	303.799	508.328		NA	NA	NA
MnPAL5	L484_024369.p01	0	1158.3	0	0	1158.2	0	1	1	216.489	77.932	19.577	12.062	15.508		NA	NA	NA
MnPAL6	L484_001028.p01	0	1122	0	0	1121.7	0	1	1	NA	0.057	NA	0.271	NA	FcPAL6	0.0752333	0.0216	2.11197
MnPAL7	L484_027341.p01	0	1108.9	0	0	1108.8	0	1	1	5.479	17.573	NA	7.06	32.767	FcPAL7	2.50507	10.9751	10.7365
Query(Q)	Subject(S)		Q Length	S Length	Identity	Gap	Align Length	Score	E-Value	Root	bark	winter-bud	male flower	leaf		L0	S0	R0
SmF5H	L484_009567.p01		521	514	0.46	0.04	484	442	2e-151	329.218	365.411	7.904	212.392	174.898	FcF5H3(Sm)	7.4151	24.2394	68.7496
SmF5H	L484_027398.p01		521	449	0.45	0.03	449	401	3e-136	36.778	0.937	NA	15.993	27.567	FcF5H4(Sm)	11.1157	0.221033	8.67587
