# Supplementary material for: Genome-wide analysis of the lignin toolbox for morus and the roles of lignin related genes in response to zinc stress
Source: PeerJ. 2021 Aug 6;9:e11964. doi: 10.7717/peerj.11964 (PMC8351576; doi:10.7717/peerj.11964)
Supplement: Supplemental Information 8 [file peerj-09-11964-s008.xlsx]

## Sheet: Sheet1
Table S2 Sequence used for lignin-related gene analysis in mulberry
Gene	Acsession Number	species	source
AtPAL1	AT2G37040	Arabidopsis thaliana	PLAZA
AtPAL2	AT3G10340	Arabidopsis thaliana	PLAZA
AtPAL3	AT3G53260	Arabidopsis thaliana	PLAZA
AtPAL4	AT5G04230	Arabidopsis thaliana	PLAZA
PoptrPAL1	PT06G12680	Populus trichocarpa	PLAZA
PoptrPAL2	PT08G03820	Populus trichocarpa	PLAZA
PoptrPAL3	PT10G22410	Populus trichocarpa	PLAZA
PoptrPAL4	PT10G22420	Populus trichocarpa	PLAZA
PoptrPAL5	PT16G09110	Populus trichocarpa	PLAZA
CdPAL	ADD12041.1	Cistanche deserticola	GenBank
PtaPAL	P52777.1	Pinus taeda	GenBank
PrPAL	AAT66434.1	Pinus pinaster	GenBank
SmPAL1-1	XP_002985337.1	Selaginella moellendorffii	GenBank
SmPAL1-2	XP_002987180.1	Selaginella moellendorffii	GenBank
VviPAL	XP_019078342.1	Vitis vinifera	GenBank
ZmPAL1	Q8VXG7.1	Zea mays	GenBank
ZmPAL2	ACG29133.1	Zea mays	GenBank
ZmPAL3	ACG27502.1	Zea mays	GenBank
ZmPAL4	NP_001151482.1	Zea mays	GenBank
At4CL1	AT1G51680	Arabidopsis thaliana	TAIR
At4CL2	AT3G21240	Arabidopsis thaliana	TAIR
At4CL3	AT1G65060	Arabidopsis thaliana	TAIR
At4CL4	AT3G21230	Arabidopsis thaliana	TAIR
Gm4CL1	AAL98709.1	Glycine max	GenBank
Gm4CL2	NP_001236418.1	Glycine max	GenBank
Gm4CL3	NP_001237270.1	Glycine max	GenBank
Gm4CL4	XP_003542129.1	Glycine max	GenBank
Os4CL1	XP_015650724.1	Oryza sativa	GenBank
Os4CL2	XP_015624111.1	Oryza sativa	GenBank
Os4CL3	XP_015625716.1	Oryza sativa	GenBank
Os4CL4	XP_015643415.1	Oryza sativa	GenBank
Os4CL5	XP_015650830.1	Oryza sativa	GenBank
Pta4CL1	P41636.1	Pinus taeda	GenBank
Pta4CL2	AAA92669.1	Pinus taeda	GenBank
Pa4CL1	AJT43268.	Plagiochasma appendiculatum	GenBank
Pto4CL1	JN937655	Populus tomentosa	GenBank
Pto4CL2	JN937655	Populus tomentosa	GenBank
Pto4CL3	JN937656	Populus tomentosa	GenBank
Pto4CL4	JN937657	Populus tomentosa	GenBank
Pto4CL5	JN937658	Populus tomentosa	GenBank
AtC3H	AT2G40890	Arabidopsis thaliana	PLAZA
AtrC3H1	ATR_00040G00620	Amborella trichopoda	PLAZA
AtrC3H2	ATR_00101G00780	Amborella trichopoda	PLAZA
BdC3H	BRADI2G21300.1	Brachypodium distachyon	PLAZA
BrC3H1	BR03G20590	Brassica rapa	PLAZA
BrC3H2	BR04G24500	Brassica rapa	PLAZA
BrC3H3	BR05G01830	Brassica rapa	PLAZA
GbC3H	AY987384.1	ginkgo biloba	GenBank
EgC3H1	EG0001G18300	Eucalyptus gunnii	PLAZA
EgC3H2	EG0001G18320	Eucalyptus gunnii	PLAZA
EgC3H3	EG0007G25650	Eucalyptus gunnii	PLAZA
OsC3H1	OS05G41440	Oryza sativa	PLAZA
PpaC3H	PP00366G00020	Physcomitrella patens	PLAZA
PoptrC3H1	PT06G03330	Populus trichocarpa	PLAZA
PoptrC3H2	PT16G03100	Populus trichocarpa	PLAZA
PoptrC3H3	PT16G03110	Populus trichocarpa	PLAZA
PtaC3H	AAL47685.1	Pinus taeda	GenBank
SmC3H	271465	Selaginella moellendorffii	Phytozome 11.0
StC3H1	ST01G010340	Solanum tuberosum	PLAZA
StC3H2	ST01G010350	Solanum tuberosum	PLAZA
StC3H3	ST01G034170	Solanum tuberosum	PLAZA
StC3H4	ST10G019630	Solanum tuberosum	PLAZA
StC3H5	ST10G019690	Solanum tuberosum	PLAZA
StC3H6	ST10G019700	Solanum tuberosum	PLAZA
VviC3H	VV08G03800	Vitis vinifera	PLAZA
ZmC3H1	ZM03G29270	Zea mays	PLAZA
ZmC3H2	ZM06G27340	Zea mays	PLAZA
AtC4H	AT2G30490	Arabidopsis thaliana	PLAZA
AtrC4H1	ATR_00025G02580	Amborella trichopoda	PLAZA
AtrC4H2	ATR_00077G00890	Amborella trichopoda	PLAZA
BrC4H1	BR03G15350	Brassica rapa	PLAZA
BrC4H2	BR03G15360	Brassica rapa	PLAZA
BrC4H3	BR04G17750	Brassica rapa	PLAZA
BrC4H4	BR04G17760	Brassica rapa	PLAZA
BrC4H5	BR05G13250	Brassica rapa	PLAZA
EgC4H1	EG0003G00430	Eucalyptus gunnii	PLAZA
EgC4H2	EG0010G15940	Eucalyptus gunnii	PLAZA
MtC4H1	MT1G111240	Medicago truncatula	PLAZA
MtC4H2	MT5G075450	Medicago truncatula	PLAZA
OsC4H1	OS01G60450	Oryza sativa	PLAZA
OsC4H2	OS02G26770	Oryza sativa	PLAZA
OsC4H3	OS02G26810	Oryza sativa	PLAZA
OsC4H4	OS05G25640	Oryza sativa	PLAZA
PpaC4H1	PP00004G01230	Physcomitrella patens	PLAZA
PpaC4H2	PP00158G00410	Physcomitrella patens	PLAZA
PpaC4H3	PP00168G00290	Physcomitrella patens	PLAZA
PpaC4H4	PP00298G00020	Physcomitrella patens	PLAZA
PpaC4H5	PP00315G00180	Physcomitrella patens	PLAZA
PoptrC4H1	PT13G15790	Populus trichocarpa	PLAZA
PoptrC4H2	PT19G13070	Populus trichocarpa	PLAZA
PoptrC4H3	PT18G14610	Populus trichocarpa	PLAZA
PtoC4H	EU760387	Populus tomentosa	GenBank
StC4H1	ST05G021840	Solanum tuberosum	PLAZA
StC4H2	ST06G033340	Solanum tuberosum	PLAZA
StC4H3	ST06G033350	Solanum tuberosum	PLAZA
VviC4H1	VV06G00340	Vitis vinifera	PLAZA
VviC4H2	VV11G10090	Vitis vinifera	PLAZA
VviC4H3	VV11G10730	Vitis vinifera	PLAZA
ZmC4H1	ZM05G28130	Zea mays	PLAZA
ZmC4H2	ZM06G21540	Zea mays	PLAZA
ZmC4H3	ZM08G12610	Zea mays	PLAZA
ZmC4H4	ZM08G32880	Zea mays	PLAZA
GbC4H1	GBI00028769	Ginkgo biloba	PLAZA
GbC4H2	GBI00030122	Ginkgo biloba	PLAZA
GbC4H3	GBI00026063	Ginkgo biloba	PLAZA
GbC4H4	GBI00030180	Ginkgo biloba	PLAZA
BdC4H1	BRADI2G53470.1	Brachypodium distachyon	PLAZA
BdC4H2	BRADI2G31510.1	Brachypodium distachyon	PLAZA
BdC4H3	BRADI3G43160.1	Brachypodium distachyon	PLAZA
PtaC4H1	PTA00002201	pinus taeda	PLAZA
PtaC4H2	PTA00062664	pinus taeda	PLAZA
PtaC4H3	PTA00024047	pinus taeda	PLAZA
PtaC4H4	PTA00054392	pinus taeda	PLAZA
PtaC4H5	PTA00065389	pinus taeda	PLAZA
SmC4H	175973	Selaginella moellendorffi	PLAZA
AtCAD1	At1g72680	Arabidopsis thaliana	GenBank
AtCAD2	At2g21730	Arabidopsis thaliana	GenBank
AtCAD3	At2g21890	Arabidopsis thaliana	GenBank
AtCAD4	At3g19450	Arabidopsis thaliana	GenBank
AtCAD5	At4g34230	Arabidopsis thaliana	GenBank
AtCAD6	At4g37970	Arabidopsis thaliana	GenBank
AtCAD7	At4g37980	Arabidopsis thaliana	GenBank
AtCAD8	At4g37990	Arabidopsis thaliana	GenBank
AtCAD9	At4g39330	Arabidopsis thaliana	GenBank
AtrCAD1	ATR_00015G00110	Amborella trichopoda	PLAZA
BdCAD3	JQ768796.1	Brachypodium distachyon	GenBank
BdCAD5	JQ768797	Brachypodium distachyon	GenBank
BrCAD1	BR01G03920	Brassica rapa	PLAZA
BrCAD2	BR03G54080	Brassica rapa	PLAZA
BrCAD3	BR05G24160	Brassica rapa	PLAZA
EglCAD	AF038561	Eucalyptus globulus	GenBank
GmCAD	TA44918_3847	Glycine max	DFCI
NtaCAD1	gi|19840	Nicotiana tabacum	GenBank
NtaCAD2	TA13780_4097	Nicotiana tabacum	DFCI
PicabCAD	gi|56605369	Picea abies	GenBank
PicsiCAD1	TA20759_3332_C12b	Picea sitchensis	DFCI
PicsiCAD2	TA22501_3332_C6a	Picea sitchensis	DFCI
PicsiCAD3	TA24642_3332_C2b	Picea sitchensis	DFCI
PicsiCAD4	TA25925_3332_C8a	Picea sitchensis	DFCI
PmaCAD	AHL67653.1	Pinus massoniana	GenBank
PtaCAD1	PTA00035415	pinus taeda	PLAZA
PtaCAD2	PTA00023275	pinus taeda	PLAZA
PtoCAD1	KF145200	Populus tomentosa	GenBank
PtoCAD2	KF145201	Populus tomentosa	GenBank
PtoCAD8	KF145195	Populus tomentosa	GenBank
PraCAD	gi|3372644	Pinus radiata	GenBank
PtaCAD1	gi|558384	Pinus taeda	GenBank
PtaCAD2	gi|558387	Pinus taeda	GenBank
PtrCAD	gi|14279693	Populus tremuloides	GenBank
PtrSAD	gi|7239225:41-1114	Populus tremuloides	GenBank
SbCAD2	ACL80889	Sorghum bicolor	GenBank
SbCAD4-2	Sb10g006300.1	Sorghum bicolor	GenBank
SbCAD4-3	Sb10g006290.1	Sorghum bicolor	GenBank
SbCAD4-4	Sb10g006280.1	Sorghum bicolor	GenBank
SbCAD4-5	Sb10g006270.1	Sorghum bicolor	GenBank
SbCAD5	Sb07g006090.1	Sorghum bicolor	GenBank
SbCAD7	Sb06g028240.1	Sorghum bicolor	GenBank
SbCAD8-1	Sb02g024220.1	Sorghum bicolor	GenBank
SbCAD8-2	Sb02g024200.1	Sorghum bicolor	GenBank
SbCAD8-4	Sb02g024190.1	Sorghum bicolor	GenBank
SmoCAD	XM_002978930	Selaginella moellendorffi	GenBank
ZmaCAD1	NP_001130781	Zea mays	GenBank
ZmaCAD2	Y13733	Zea mays	GenBank
AtCCR1	AT1G15950	Arabidopsis thaliana	TAIR
AtCCR2	AT1G80820	Arabidopsis thaliana	TAIR
EgCCR	X79566	Eucalyptus gunnii	GenBank
GbCCR	HQ901358	Ginkgo biloba	GenBank
LeCCR1	DQ019125	Lycopersicon esculentum	GenBank
LeCCR2	DQ019126	Lycopersicon esculentum	GenBank
LlCCR	AM263501	Leucaena leucocephala	GenBank
MtCCR1	MT2G104960	Medicago truncatula	PLAZA
MtCCR2	MT4G006940	Medicago truncatula	PLAZA
PhCCR1	KF040494	Petunia x hybrida	PLAZA
PmCCR	ACE76870	Pinus massoniana	GenBank
PpCCR	HQ889311	Pen nisetum purpureum	GenBank
PpaCCR	PP00002G03200	Physcomitrella patens	PLAZA
PtCCR	AF217958	Populus tremuloides	GenBank
PvCCR1a	GQ450296	Panicum virgatum	GenBank
PvCCR2a	GQ450301	Panicum virgatum	GenBank
PvCCR1e	GQ450300	Panicum virgatum	GenBank
PvCCR-like1	GQ450304	Panicum virgatum	GenBank
PvCCR-like2a	GQ450305	Panicum virgatum	GenBank
SmCCR1	271114	Selaginella moellendorffii	phytozome 11.0
SmCCR2-1	134883	Selaginella moellendorffii	phytozome 11.0
SmCCR3	234633	Selaginella moellendorffii	Phytozome 11.0
PpeCCR1	PPE_003G08510	Prunus persica	PLAZA
PtoCCR1	KP281597	Populus tomentosa	NCBI
PtoCCR7	KF145198	Populus tomentosa	NCBI
VivCCR1	XM_002273418	Vitis vinifera	GenBank
PkoCCR	MK773530	Pinus koraiensis	GenBank
ZjuCCR-like	MK773534	Ziziphus jujube,	NCBI
AtCOMT	AY081565.1	Arabidopsis thaliana	GenBank
AtrCOMT	ATR_00001G05000	Amborella trichopoda	PLAZA
BdCOMT1	BRADI3G16530.1	Brachypodium distachyon	PLAZA
BdCOMT2	BRADI1G14870.1	Brachypodium distachyon	PLAZA
BdCOMT3	BRADI2G02380.1	Brachypodium distachyon	PLAZA
BdCOMT4	BRADI2G02390.1	Brachypodium distachyon	PLAZA
BrCOMT1	BR01G17980	Brassica rapa	PLAZA
BrCOMT2	BR02G15320	Brassica rapa	PLAZA
BrCOMT3	BR03G13260	Brassica rapa	PLAZA
BrCOMT4	BR03G49870	Brassica rapa	PLAZA
BrCOMT5	BR10G07800	Brassica rapa	PLAZA
BrCOMT6	BR10G07820	Brassica rapa	PLAZA
EgCOMT1	EG0001G11260	Eucalyptus gunnii	PLAZA
EgCOMT2	EG0001G11270	Eucalyptus gunnii	PLAZA
EgCOMT3	EG0001G11290	Eucalyptus gunnii	PLAZA
EgCOMT4	EG0001G11300	Eucalyptus gunnii	PLAZA
EgCOMT5	EG0001G24430	Eucalyptus gunnii	PLAZA
EgCOMT6	EG0011G00290	Eucalyptus gunnii	PLAZA
EgCOMT7	EG0011G03970	Eucalyptus gunnii	PLAZA
GbCOMT1	GBI00018158	Ginkgo biloba	PLAZA
GbCOMT2	GBI00005654	Ginkgo biloba	PLAZA
GbCOMT3	GBI00020775	Ginkgo biloba	PLAZA
HbCOMT	KC859304.1	Hibiscus cannabinus	GenBank
MtCOMT1	MT3G092900	Medicago truncatula	PLAZA
MtCOMT2	MT5G098170	Medicago truncatula	PLAZA
OsCOMT	OS08G06100	Oryza sativa	PLAZA
PpCOMT	PP00056G00300	Physcomitrella patens	PLAZA
StCOMT	ST03G017050	Solanum tuberosum	PLAZA
VviCOMT1	VV18G02010	Vitis vinifera	PLAZA
VviCOMT2	VV19G00010	Vitis vinifera	PLAZA
SbCOMT	AF387790.1	Sorghum bicolor	GenBank
SmCOMT	GQ166949.1	Selaginella moellendorffii	GenBank
SmCOMT-like	76630	Selaginella moellendorffii	Phytozome 11.0
GhCOMT1	FJ479708.1	Gossypium hirsutum	GenBank
GhCOMT2	FJ479709.1	Gossypium hirsutum	GenBank
GhCOMT3	FJ848869.1	Gossypium hirsutum	GenBank
PaCOMT	AJ868575.1	Picea abies	GenBank
PbCOMT	NP_001289246	Pyrus x bretschneideri	GenBank
PtaCOMT1	PTA00059666	pinus taeda	PLAZA
PtaCOMT2	PTA00075952	pinus taeda	PLAZA
PtaCOMT3	PTA00021132	pinus taeda	PLAZA
PtaCOMT4	PTA00028795	pinus taeda	PLAZA
PtaCOMT5	PTA00032451	pinus taeda	PLAZA
PtaCOMT6	PTA00036709	pinus taeda	PLAZA
PtaCOMT7	PTA00029648	pinus taeda	PLAZA
PtaCOMT8	PTA00031856	pinus taeda	GenBank
PtoCOMT1	KX348777	Populus tomentosa	GenBank
PtoCOMT2	KX348778	Populus tomentosa	GenBank
LpCOMT	AF010291.1	Lolium perenne	GenBank
TaCOMT	AF502287.1	Triticum aestivum	GenBank
LlCOMT	EF546435.1	Leucaena leucocephala	GenBank
ZmCOMT	AY323283.1	Zea mays	GenBank
MsCOMT	M63853.1	Medicago sativa	GenBank
PoptrCOMT1	PT15G00310	Populus trichocarpa	PLAZA
PoptrCOMT2	PT12G00640	Populus trichocarpa	PLAZA
PoptrCOMT3	PT01G45110	Populus trichocarpa	PLAZA
PoptrCOMT4	PT02G18050	Populus trichocarpa	PLAZA
PoptrCOMT5	PT02G18060	Populus trichocarpa	PLAZA
PoptrCOMT6	PT02G18070	Populus trichocarpa	PLAZA
PoptrCOMT7	PT02G07680	Populus trichocarpa	PLAZA
PoptrCOMT8	PT11G15050	Populus trichocarpa	PLAZA
PoptrCOMT9	PT14G10660	Populus trichocarpa	PLAZA
PoptrCOMT10	PT14G10650	Populus trichocarpa	PLAZA
PoptrCOMT11	PT16G10160	Populus trichocarpa	PLAZA
AtCCoAOMT1	AT4G34050	Arabidopsis thaliana	PLAZA
AtCCoAOMT2	AT1G67980	Arabidopsis thaliana	PLAZA
AtrCCoAOMT1	ATR_00046G00270	Amborella trichopoda	PLAZA
BdCCoAOMT1	BRADI1G48370.2	Brachypodium distachyon	PLAZA
BdCCoAOMT2	BRADI3G39420.1	Brachypodium distachyon	PLAZA
BdCCoAOMT3	BRADI4G33340.1	Brachypodium distachyon	PLAZA
BdCCoAOMT4	BRADI3G39400.1	Brachypodium distachyon	PLAZA
BdCCoAOMT5	BRADI3G39390.1	Brachypodium distachyon	PLAZA
BdCCoAOMT6	BRADI3G39380.1	Brachypodium distachyon	PLAZA
BdCCoAOMT7	BRADI3G39410.1	Brachypodium distachyon	PLAZA
BrCCoAOMT1	BR03G53930	Brassica rapa	PLAZA
BrCCoAOMT2	BR08G14250	Brassica rapa	PLAZA
BrCCoAOMT3	BR02G18770	Brassica rapa	PLAZA
BrCCoAOMT4	BR08G22740	Brassica rapa	PLAZA
CreCCoAOMT	EDP08738	Chlamydomonas reinhardtii	Phytozome 11.0
GbCCoAOMT1	GBI00029776	Ginkgo biloba	PLAZA
GbCCoAOMT2	GBI00024553	Ginkgo biloba	PLAZA
GbCCoAOMT3	GBI00027075	Ginkgo biloba	PLAZA
GbCCoAOMT4	GBI00028946	Ginkgo biloba	PLAZA
EgCCoAOMT1	EG0007G10340	Eucalyptus gunnii	PLAZA
EgCCoAOMT2	EG0009G08910	Eucalyptus gunnii	PLAZA
EgCCoAOMT3	EG0008G37570	Eucalyptus gunnii	PLAZA
EgCCoAOMT4	EG0008G37590	Eucalyptus gunnii	PLAZA
EgCCoAOMT5	EG0008G37610	Eucalyptus gunnii	PLAZA
MtCCoAOMT1	MT4G085590	Medicago truncatula	PLAZA
MtCCoAOMT2	MT4G094368	Medicago truncatula	PLAZA
OsCCoAOMT1	OS06G06980	Oryza sativa	PLAZA
PpaCCoAOMT1	PP00016G00140	Physcomitrella patens	PLAZA
StCCoAOMT1	ST01G045060	Solanum tuberosum	PLAZA
StCCoAOMT2	ST02G031750	Solanum tuberosum	PLAZA
StCCoAOMT3	ST02G031760	Solanum tuberosum	PLAZA
StCCoAOMT4	ST10G016810	Solanum tuberosum	PLAZA
StCCoAOMT5	ST09G024490	Solanum tuberosum	PLAZA
VviCCoAOMT1	VV03G06460	Vitis vinifera	PLAZA
VviCCoAOMT2	VV07G05270	Vitis vinifera	PLAZA
VviCCoAOMT3	VV01G04600	Vitis vinifera	PLAZA
VviCCoAOMT4	VV01G04620	Vitis vinifera	PLAZA
VviCCoAOMT5	CBI27644.3	Vitis vinifera	Genbank
ZmCCoAOMT1	ZM06G09340	Zea mays	PLAZA
ZmCCoAOMT2	ZM09G03590	Zea mays	PLAZA
SmCCoAOMT1	80209	Selaginella moellendorffii	Phytozome 11.0
SmCCoAOMT2	271191	Selaginella moellendorffii	Phytozome 11.0
SmCCoAOMT3	101568	Selaginella moellendorffii	Phytozome 11.0
PtoCCoAOMT1	KX227458	Populus tomentosa	Genbank
PtoCCoAOMT2	KX227457	Populus tomentosa	Genbank
PtoCCoAOMT3	KX227456	Populus tomentosa	Genbank
PoptrCCoAOMT1	PT09G09980	Populus trichocarpa	PLAZA
PoptrCCoAOMT2	PT01G30480	Populus trichocarpa	PLAZA
PoptrCCoAOMT3	PT08G13660	Populus trichocarpa	PLAZA
PoptrCCoAOMT-like	PT10G10440	Populus trichocarpa	PLAZA
AtCSE1（AtMAGL3）	AT1G52760	Arabidopsis thaliana	TAIR10
AtMAGL1	AT1G11090	Arabidopsis thaliana	TAIR10
AtMAGL2	AT1G18360	Arabidopsis thaliana	TAIR10
AtMAGL4	AT1G73480	Arabidopsis thaliana	TAIR10
AtMAGL5	AT1G77420	Arabidopsis thaliana	TAIR10
AtMAGL6	AT2G39400	Arabidopsis thaliana	TAIR10
AtMAGL7	AT2G39410	Arabidopsis thaliana	TAIR10
AtMAGL8	AT2G39420	Arabidopsis thaliana	TAIR10
AtMAGL9	AT2G47630	Arabidopsis thaliana	TAIR10
AtMAGL10	AT3G55180	Arabidopsis thaliana	TAIR10
AtMAGL11	AT3G55190	Arabidopsis thaliana	TAIR10
AtMAGL12	AT3G62860	Arabidopsis thaliana	TAIR10
AtMAGL13	AT5G11650	Arabidopsis thaliana	TAIR10
AtMAGL14	AT5G14980	Arabidopsis thaliana	TAIR10
AtMAGL15	AT5G16120	Arabidopsis thaliana	TAIR10
AtMAGL16	AT5G19290	Arabidopsis thaliana	TAIR10
LkCSE	MK211161	Larix kaempferi	NCBI
PmaCSE	KP234263.1	Pinus massoniana	NCBI
PoptrCSE1	PT03G05920	Populus trichocarpa	PLAZA
PoptrCSE2	PT01G17500	Populus trichocarpa	PLAZA
MtCSE1	MT4G127220	Medicago truncatula	PLAZA
EgCSE	EG0006G20980	Eucalyptus grandis	PLAZA
AtHCT	AT5G48930	Arabidopsis thaliana	PLAZA
AtrHCT1	ATR_00137G00320	Amborella trichopoda	PLAZA
AtrHCT2	ATR_00727G00010	Amborella trichopoda	PLAZA
EgHCT1	EG0006G33900	Eucalyptus grandis	PLAZA
EgHCT2	EG0006G33910	Eucalyptus grandis	PLAZA
EgHCT3	EG0006G33920	Eucalyptus grandis	PLAZA
EgHCT4	EG0006G33960	Eucalyptus grandis	PLAZA
EgHCT5	EG0010G26760	Eucalyptus grandis	PLAZA
MtHCT1	MT2G064495	Medicago truncatula	PLAZA
MtHCT2	MT2G105330	Medicago truncatula	PLAZA
MtHCT3	MT4G007540	Medicago truncatula	PLAZA
MtHCT4	MT8G075610	Medicago truncatula	PLAZA
OsHCT1	OS02G39850	Oryza sativa ssp. japonica	PLAZA
OsHCT2	OS04G42250	Oryza sativa ssp. japonica	PLAZA
PpHCT1	PP00022G00830	Physcomitrella patens	PLAZA
PoptrHCT1	PT01G04290	Populus trichocarpa	PLAZA
PoptrHCT10	PT18G10550	Populus trichocarpa	PLAZA
VvHCT1	VV09G00780	Vitis vinifera	PLAZA
VvHCT2	VV11G07380	Vitis vinifera	PLAZA
SbHCT	XP_002452435.	Sorghum bicolor	GenBank
ZmHCT1	ZM02G10890	Zea mays	PLAZA
ZmHCT2	ZM05G33480	Zea mays	GenBank
LeHQT	CAE46933	Lycopersicon esculentum	GenBank
SmHCT	152997	Selaginella moellendorffii	Phytozome 11.0
PglHCT	GCZO01061061	Picea glauca	GenBank
NtaHCT	Q8GSM7/AJ507825	Nicotiana tabacum	GenBank
CcaHCT	DQ104740	Cynara cardunculus L.	GenBank
LkaHCT	AHA44839	Larix kaempferi	GenBank
PviHCT1a	AB723827	Panicum virgatum	GenBank
PviHCT2	KC696573	Panicum virgatum	GenBank
NtaHQT	CAE46932	Nicotiana tabacum	GenBank
CcaHQT	ABK79690	Cynara cardunculus L.	GenBank
AtF5H1	AT4G36220	Arabidopsis thaliana	PLAZA
AtF5H2	AT5G04330	Arabidopsis thaliana	PLAZA
AtrF5H	ATR_00001G04440	Amborella trichopoda	PLAZA
BrF5H1	BR01G02310	Brassica rapa	PLAZA
BrF5H2	BR06G24240	Brassica rapa	PLAZA
BrF5H3	BR06G39500	Brassica rapa	PLAZA
EgF5H1	EG0009G20000	Eucalyptus gunnii	PLAZA
EgF5H2	EG0010G20700	Eucalyptus gunnii	PLAZA
MtF5H1	MT4G071710	Medicago truncatula	PLAZA
MtF5H2	MT5G021390	Medicago truncatula	PLAZA
MtF5H3	MT8G076290	Oryza sativa	PLAZA
OsF5H1	OS03G02180	Oryza sativa	PLAZA
OsF5H2	OS10G36848	Oryza sativa	PLAZA
PoptrF5H1	PT05G11750	Populus trichocarpa	PLAZA
PoptrF5H2	PT07G01640	Populus trichocarpa	PLAZA
PoptrF5H3	PT04G16160	Populus trichocarpa	PLAZA
PoptrF5H4	PT09G12360	Populus trichocarpa	PLAZA
PtoF5H1	KU573391	Populus tomentosa	GenBank
PtoF5H2	KX227460	Populus tomentosa	GenBank
PtoF5H3	KU573268	Populus tomentosa	GenBank
VviF5H1	VV03G06000	Vitis vinifera	PLAZA
VviF5H2	VV03G06050	Vitis vinifera	PLAZA
VviF5H3	VV04G01160	Vitis vinifera	PLAZA
ZmF5H1	ZM01G40320	Zea mays	PLAZA
ZmF5H2	ZM05G08960	Zea mays	PLAZA
SmF5H	ABV80343.1	Selaginella moellendorffii	GenBank
BdF5H1	BRADI3G30590.1	Brachypodium distachyon	PLAZA
BdF5H2	BRADI1G77597.1	Brachypodium distachyon	PLAZA
BdF5H3	BRADI1G77740.1	Brachypodium distachyon	PLAZA
BdF5H4	BRADI1G36790.1	Brachypodium distachyon	PLAZA
BdF5H-like1	BRADI4G31380.1	Brachypodium distachyon	PLAZA
BdF5H-like2	BRADI4G31367.1	Brachypodium distachyon	PLAZA
BdF5H-like3	BRADI5G08570.1	Brachypodium distachyon	PLAZA
GbF5H-like1	GBI00006168	Ginkgo biloba	PLAZA
GbF5H-like2	GBI00005369	Ginkgo biloba	PLAZA
PpaF5H-like1	PP00098G00390	Physcomitrella patens	PLAZA
PpaF5H-like2	PP00001G00380	Physcomitrella patens	PLAZA
PtaF5H-like	PTA00007310	pinus taeda	PLAZA
