# Supplementary material for: Genome-wide analysis of the lignin toolbox for morus and the roles of lignin related genes in response to zinc stress
Source: PeerJ. 2021 Aug 6;9:e11964. doi: 10.7717/peerj.11964 (PMC8351576; doi:10.7717/peerj.11964)
Supplement: Supplemental Information 9 [file peerj-09-11964-s009.xlsx]

## Sheet: Sheet1
Table S3 Primers used for qRT-PCR
Primer Name	Sequence 5‘-3’
4CL1-QF	TCTTGACGGTTTCGACTTAC
4CL1-QR	GATTCTCTCCATCAACCTGT
4CL2-QF	GAGCTGACTAATTCCGACGA
4CL2-QR	CATGATCACGACCGTTGCT
4CL3-QF	ACGACAAGAAGCTCCCGAAA
4CL3-QR	TAGGATGACTCCCTTGGGCA
4CL4-QF	TCGTCATGCTCTTGCTCCAT
4CL4-QR	TCGATGCACGCGATCCTCA
4CL5-QF	TTCTCATCTTCGCCCCCAAT
4CL5-QR	GGACTGATTTGTGTTCGGCA
4CL6-QF	CCTAGTGTCCAACCTCTCCC
4CL6-QR	CGGCAAGTTGAATTTAGCGG
C4H1-QF	GCGACATCTTCCTCCTCCGA
C4H1-QR	GACTCCCACCCGTACCGGTA
C4H2-QF	TGACATCTTCCTCCTCCGCA
C4H2-QR	CTGGACGACCTTGTTGGTGA
C3H1-QF	TTTGGGGCCACTCTGAACGT
C3H1-QR	GGCCCTAACCTCTTCCTCTC
CAD1-QF	TATCCTCTCGTTCCTGGGCAT
CAD1-QR	AAAGTGCTCGTCGGCTACCA
CAD2-QF	CCTCTCGTTCCTGGGCATGA
CAD2-QR	TGTCCGGAATGCGAACGATA
CAD3-QF	TTGTGGGGGAAGTGGTGGAA
CAD3-QR	TCTGGCACCATTCCTTCTGG
CCR1-QF	AAGCCATCACTGGTTGCCAT
CCR1-QR	TCCAACAAGACTCATCGACG
CCR2-QF	CCTTGATTACGAGAGCCTCA
CCR2-QR	CAACAAGACTCGTCAACCAC
F5H1-QF	CATGGTGGCGATCTCGTCAC
F5H1-QR	GCTTGTCTTCAAGCTCACCA
CCoAOMT1-QF	GAGCCTTCTCCAAAGCGATG
CCoAOMT1-QR	ATCTTTCCGTCGTCGGGAAG
COMT4-QF	GACGAGGAAGCCAACCTCTT
COMT4-QR	TCGGGAAGATTCCTCAGCGA
HCT1-QF	GCCGTATCGAGATCGACTGC
HCT1-QR	TGTCGGACCATGTGTTGACA
HCT2-QF	TCGTCACCTTCTACCCCGTC
HCT2-QR	CCGAGAGAAACTCCACCGCA
CSE1-QF	TTTCTGGGGAGACATGCCGG
CSE1-QR	CGTAGCCCCAGTTGGTGAA
CSE2-QF	CAAGACTACTACGCCCTCCA
CSE2-QR	GTCGACTTCCGGGACGAAG
PAL1-QF2	GAATCCCTTACCGCCACCCA
PAL1-QR2	CAACTTGTGCGTCAAGTGGT
PAL3-QF	TACCATTTCGCAGGTGGAGC
PAL3-QR	CAATGTGTGGCAAGATTCTG
PAL7-QF	CAAGGTCGACCTTGATGAGG
PAL7-QR	TGGCTGCTTTGGAGTAACTG
F5H3-QF	CTCGAACATCACGTGGTCCC
F5H3-QR	ACACCATTCGGCTGATCACG
F5H4-QF	CAGCTTTCTCACGCCACTCT
F5H4-QR	AGCACATGAGCATGAAACCG
Actin-QF	AGGCCGTCCTTTCCCTCTAT
Actin-QR	TCCCTCACAATTTCCCGCTC
