# Supplementary material for: Genome-wide analysis of the lignin toolbox for morus and the roles of lignin related genes in response to zinc stress
Source: PeerJ. 2021 Aug 6;9:e11964. doi: 10.7717/peerj.11964 (PMC8351576; doi:10.7717/peerj.11964)
Supplement: Supplemental Information 10 [file peerj-09-11964-s010.xlsx]

## Sheet: Sheet1
Table S4 Putative functional classification of 56 candidate lignification-related genes
Morus notabilis	Fenngchi (morus alba)	phylogentic clade	Function
Mn4CL1	Fc4CL1	bona fide I	lignification; reponse to Zinc stress
Mn4CL2	Fc4CL2	bona fide I	lignification reponse to Zinc stress
Mn4CL3	Fc4CL3	bona fide II	flavonoids，reponse to Zinc stress
Mn4CL4	Fc4CL4	bona fide I	lignification reponse to Zinc stress
Mn4CL5	Fc4CL5	bona fide	flavonoids?reponse to Zinc stress
Mn4CL6	Fc4CL6	bona fide	flavonoids?reponse to Zinc stress
MnC3H1	FcC3H1	bona fide	lignification; reponse to Zinc stress
MnC3H2	FcC3H2
MnC3H3	FcC3H3
MnC3H4	FcC3H4
MnC3H5	FcC3H5
MnC4H1	FcC4H1	bona fide	lignification,reponse to Zinc stress
MnC4H2	FcC4H2	bona fide	lignification; reponse to Zinc stress
MnC4H3	FcC4H3
MnCAD1	FcCAD1	bona fide II	lignification,reponse to Zinc stress
MnCAD2	FcCAD2	bona fide II	reponse to Zinc stress
MnCAD3	FcCAD3	bona fide I	lignification; reponse to Zinc stress
MnCAD4	FcCAD4
MnCAD5	FcCAD5
MnCAD6	FcCAD6
MnCCoAOMT1	FcCCoAOMT1	bona fide	lignification; reponse to Zinc stress
MnCCoAOMT2	FcCCoAOMT2
MnCCoAOMT3	FcCCoAOMT3
MnCCR1	FcCCR1	bona fide	lignification; reponse to Zinc stress
MnCCR2	FcCCR2	bona fide	lignification; reponse to Zinc stress
MnCCR3	FcCCR3
MnCCR4	FcCCR4
MnCCR5	FcCCR5
MnCCR6	FcCCR6
MnCCR7	FcCCR6
MnCOMT1	FcCOMT1
MnCOMT2	FcCOMT2
MnCOMT3	FcCOMT3
MnCOMT4	FcCOMT4	bona fide	lignification,reponse to Zinc stress
MnCOMT5	FcCOMT5
MnCOMT6	FcCOMT6
MnCSE1	FcCSE1	bona fide	lignification,reponse to Zinc stress
MnCSE2	FcCSE2	bona fide?	lignification?,reponse to Zinc stress
MnCSE3	NA
MnF5H(Sm)	FcF5H3(Sm)		response to zinc stress
MnF5H(Sm)	FcF5H4(Sm)		response to zinc stress
MnF5H1	FcF5H1	bona fide	lignification; reponse to Zinc stress
MnF5H2	FcF5H2
MnHCT1	FcHCT1	bona fide	lignification; reponse to Zinc stress
MnHCT2	FcHCT2	bona fide	lignification; reponse to Zinc stress
MnHCT3	NA	bona fide
MnHCT4	FcHCT4	bona fide
MnHCT5	FcHCT5	bona fide
MnHCT6	NA	bona fide
MnPAL1	NA	bona fide	lignification
MnPAL2	NA	bona fide	anthocyanin production
MnPAL3	FcPAL3	bona fide	lignification; reponse to Zinc stress
MnPAL4	NA	bona fide	anthocyanin production
MnPAL5	NA	bona fide	lignification
MnPAL6	FcPAL6	bona fide
MnPAL7	FcPAL7	bona fide	reponse to Zinc stress
	Morus notabilis	Fengchi (morus alba)
Total candidate	56	49
Tota bond fide	31	25
Lignification	19	17
lignification; reponse to Zinc stress		16
