# Supplementary material for: Genome-wide analysis of the lignin toolbox for morus and the roles of lignin related genes in response to zinc stress
Source: PeerJ. 2021 Aug 6;9:e11964. doi: 10.7717/peerj.11964 (PMC8351576; doi:10.7717/peerj.11964)
Supplement: Supplemental Information 11 [file peerj-09-11964-s011.xls]

## Sheet: Sheet1
Raw data for qRT-PCR
		Control						excess Zn
		A1	A2	A3	A4	A5	A6	B1	B2	B3	B4	B5	B6
4CL1	Root	0.004013	0.003437	0.006094	0.006425	0.007894	0.005599	0.012369	0.019371	0.008557	0.004971	0.006503	0.003513
	Stem	0.040066	0.045133	0.048167	0.061027	0.055578	0.063385	0.056227	0.027325	0.030183	0.023219	0.028504	0.039007
	Leaf	0.039593	0.039212	0.037226	0.019544	0.02841	0.028393	0.041895	0.056986	0.091031	0.049441	0.131722	0.091931
4CL2	Root	0.00545	0.00492	0.00923	0.00594	0.00496	0.00503	0.00687	0.00841	0.01366	0.00835	0.01222	0.00895
	Stem	0.009	0.00945	0.01311	0.01272	0.01282	0.00817	0.01375	0.00801	0.01823	0.0253	0.01882	0.01653
	Leaf	0.00592	0.00646	0.00707	0.00917	0.00591	0.00617	0.00594	0.00333	0.00322	0.0031	0.00398	0.00583
4CL3	Root	0.23776	0.205294	0.219925	0.212495	0.118609	0.101762	0.471761	0.465857	0.406253	0.348747	0.254241	0.31419
	Stem	0.134435	0.113759	0.043367	0.057529	0.059294	0.050229	0.012525	0.021811	0.028349	0.027612	0.008295	0.020986
	Leaf	0.207162	0.226966	0.254634	0.187367	0.126447	0.200515	0.007417	0.008032	0.002031	0.008328	0.009407	0.003849
4CL4	Root	0.021102	0.019082	0.023644	0.020989	0.019142	0.021656	0.021771	0.036716	0.027859	0.030459	0.030474	0.028146
	Stem	0.071018	0.048064	0.096976	0.085946	0.078243	0.099335	0.150651	0.139586	0.178391	0.231843	0.217619	0.307283
	Leaf	0.017603	0.019234	0.021695	0.02293	0.021282	0.019975	0.001912	0.001678	0.002638	0.002639	0.001682	0.001844
4CL5	Root	0.222611	0.238792	0.253298	0.231618	0.291189	0.143517	0.217532	0.273034	0.225555	0.297353	0.326638	0.289565
	Stem	0.31714	0.342515	0.265927	0.214121	0.191088	0.201159	0.268303	0.410289	0.305447	0.81466	0.318998	0.097208
	Leaf	0.332037	0.303068	0.363709	0.388731	0.317553	0.351836	0.051951	0.056951	0.054828	0.053603	0.045431	0.034308
4CL6	Root	0.050601	0.057911	NA	0.087168	0.031193	0.033442	0.001145	0.00766	0.1	0.020074	0.001469	0.044363
	Stem	0.056547	0.028893	0.082496	0.025271	0.024115	0.059209	0.04352	0.155505	0.10728	0.099513	0.103046	0.131393
	Leaf	0.202807	0.187719	0.277133	0.197006	0.170734	0.249292	0.112229	0.04319	0.03678	0.043767	0.029238	0.022102
C3H1	Root	0.011484	0.011315	0.009133	0.009374	0.007639	0.008934	0.022279	0.020464	0.024649	0.022865	0.019389	0.020681
	Stem	0.052533	0.050503	0.056009	0.041356	0.047421	0.039765	0.136997	0.161426	0.147038	0.16005	0.134122	0.183889
	Leaf	0.013983	0.012372	0.01255	0.012573	0.012886	0.01287	0.020299	0.017576	0.018938	0.015306	0.016604	0.026447
C4H1	Root	0.867328	0.796813	1.0896	1.09683	1.16182	1.12863	2.69436	2.71822	3.82963	2.87395	3.07664	2.87314
	Stem	2.81544	2.43695	2.80583	2.85115	2.84592	2.68876	8.86794	11.3505	6.6401	10.4478	4.6051	4.14001
	Leaf	0.307838	0.295405	0.309865	0.384607	0.297789	0.314185	1.14547	1.17584	0.953494	0.931263	0.672295	0.944486
C4H2	Root	0.337097	0.396583	0.334088	0.3761	0.369638	0.378287	0.652274	0.618413	0.720957	0.72449	0.706776	0.652263
	Stem	2.0364	2.00115	2.25719	2.73484	2.16449	2.48755	5.82883	9.19364	6.10583	7.47994	5.87204	5.74254
	Leaf	1.85715	1.58984	1.45	1.55741	1.67303	1.46158	0.54164	0.550073	0.540181	0.56767	0.666974	0.451012
CCR1	Root	0.380668	0.393206	0.373243	0.455489	0.445085	0.438354	0.347751	0.400057	0.411806	0.354539	0.40105	0.393657
	Stem	0.429534	0.540083	0.616914	0.558959	0.506167	0.615485	3.57126	3.45761	3.74383	3.47745	3.58669	4.04757
	Leaf	0.401994	0.287232	0.372175	0.241762	0.325791	0.506771	0.188817	0.144065	0.1512	0.168185	0.162762	0.166229
CCR2	Root	0.019464	0.031866	0.019717	0.019214	0.022016	0.019657	0.010765	0.003184	0.005046	0.020958	0.015878	0.003749
	Stem	0.025598	0.01913	0.010029	0.009565	0.009341	0.010767	0.034462	0.040873	0.051798	0.032252	0.018173	0.017903
	Leaf	0.022549	0.018768	0.011881	0.006076	0.014755	0.015002	0.021953	0.020387	0.033723	0.023235	0.039349	0.031165
CAD1	Root	0.075188	0.047014	0.073683	0.058381	0.072601	0.072005	0.209532	0.209557	0.183641	0.238723	0.202419	0.309461
	Stem	0.22173	0.218331	0.262635	0.239863	0.311586	0.308693	0.296208	0.335124	0.353025	0.296895	0.285658	0.290261
	Leaf	0.102704	0.18283	0.138124	NA	0.196112	0.31973	0.401212	0.437376	0.374553	0.417771	0.334223	NA
CAD2	Root	0.001625	0.001364	0.001634	0.001415	0.001151	0.001397	0.001023	0.001196	0.001099	0.0012	0.001095	0.001325
	Stem	0.004452	0.000832	0.003957	0.003589	0.003336	0.002963	0.006431	0.003466	0.006188	0.004675	0.006978	0.006259
	Leaf	0.0142031	0.015069	0.0144761	0.0133528	0.0139144	0.0225202	0.006689	0.008182	0.00717	0.00481	0.005991	0.00699
CAD3	Root	0.358182	0.470406	0.462217	0.398429	0.512986	0.467797	1.78086	NA	2.05143	1.99074	2.08791	2.15007
	Stem	0.845093	1.11891	0.918203	1.19786	1.10599	1.14039	1.25612	0.937902	0.807805	1.0329	1.12696	1.17127
	Leaf	0.034819	0.036305	0.026473	0.003677	0.015938	0.018829	0.042223	0.060288	0.008028	0.073309	0.051256	0.078353
CCOAOMT1-2	Root	0.229539	0.123095	0.323628	0.324823	0.48766	0.453022	0.466001	0.508198	0.448694	0.309608	0.659307	0.428457
	Stem	2.27809	1.68766	2.12194	2.07435	2.31215	2.7651	1.86188	1.89675	1.09692	1.70252	2.69039	1.43552
	Leaf	0.517617	0.708448	0.943572	0.104284	0.702043	0.43584	0.635741	0.602755	0.460426	0.719785	0.690385	0.609869
COMT4	Root	1.77392	1.93988	1.87246	2.12128	NA	3.171	1.19589	1.26096	1.29034	1.39349	1.18945	1.20973
	Stem	3.55535	4.06822	3.33679	3.89017	3.86198	3.12835	2.29795	2.22892	2.53015	2.51985	2.22394	2.19903
	Leaf	0.97841	1.00218	1.39856	0.95603	1.0562	1.13057	0.812459	0.795911	0.750755	0.867237	0.99519	0.767703
CSE1	Root	0.445173	0.105946	0.37474	0.293139	0.328541	0.365676	0.643071	0.569623	0.694481	0.847875	0.715978	0.73925
	Stem	1.06041	1.15358	1.48789	1.22772	1.21528	1.22338	1.71023	1.21825	1.53696	1.48896	1.34281	1.06902
	Leaf	0.700346	0.522947	0.744963	0.543905	0.579675	0.505331	1.16466	1.11692	1.45299	1.57598	1.08769	1.07796
CSE2	Root	0.012541	0.014541	0.014892	0.013482	0.017892	0.012475	0.037422	0.035462	0.04973	0.046633	0.028576	0.0558
	Stem	0.046713	0.046344	0.042645	0.044584	0.049279	0.050713	0.116312	0.072349	0.050341	0.067509	0.079184	0.068161
	Leaf	0.017298	0.017215	0.020048	0.021509	0.020558	0.023009	0.011078	0.011648	0.020035	0.017851	0.018897	0.008162
HCT1	Root	0.00719647	0.000799976	0.00611755	0.00623846	0.0111452	0.00719071	0.187022	0.11603	0.262966	0.202865	0.222892	0.276922
	Stem	0.0198865	0.0210333	0.0279045	0.0280934	0.0346062	0.0242294	0.412326	0.51244	0.384092	0.550872	0.78415	0.550811
	Leaf	0.0022932	0.00226219	0.00220499	0.00452611	0.00133577	0.000813448	0.00901546	0.00553816	0.00463639	0.00692912	0.00239627	0.00159566
HCT2	Root	0.011508	0.009353	0.017282	0.010362	0.012511	0.014263	0.059987	0.066303	0.059604	0.060139	0.068152	0.066416
	Stem	0.036457	0.04161	0.06482	0.058816	0.043913	0.060078	0.168042	0.04257	0.088225	0.082763	0.101153	0.084841
	Leaf	0.028668	0.025932	0.092154	0.025209	0.065881	0.067703	0.095072	0.042377	0.086894	0.049663	0.093498	0.027382
PAL3	Root	0.02592	0.016097	0.021964	0.026261	0.018742	0.051339	0.065696	0.046355	0.066567	0.029949	0.023208	0.005522
	Stem	0.063456	0.065698	0.040631	0.068093	0.086449	0.05947	0.028364	0.033708	0.036383	0.047077	0.039056	0.031036
	Leaf	0.017061	0.022248	0.007685	0.004118	0.014288	0.010571	0.018017	0.025044	0.014935	0.011524	0.0136	0.026835
PAL7	Root	0.011055	0.008485	0.023717	0.014396	0.022977	0.048788	0.045623	0.028853	0.053877	0.027503	0.022468	0.040169
	Stem	0.079954	0.078904	0.088779	0.104739	0.107675	0.153746	0.341945	0.162255	0.274503	0.330826	0.081657	0.093467
	Leaf	0.076269	0.085967	0.126507	0.102729	0.083716	0.069507	0.023592	0.021687	0.021304	0.016989	0.023114	0.02344
F5H1	Root	0.535088	1.21993	2.8349	2.05583	0.743977	0.718464	0.38991	0.243352	0.341536	0.477258	0.527924	0.406024
	Stem	11.9019	12.7528	9.94302	8.45423	10.3834	NA	2.34824	5.86651	4.26491	4.15989	7.68109	4.40268
	Leaf	1.85052	1.04133	1.04807	1.06827	0.660368	0.613114	1.19663	1.2435	2.80459	2.63077	1.67362	0.492616
F5H3	Root	0.188315	0.09351	0.1327	0.214357	0.200914	0.181124	0.217775	0.243317	0.245333	0.268074	0.321971	0.366972
	Stem	0.368519	0.541725	0.347196	0.420254	0.290812	0.381983	0.379272	0.407464	0.486167	0.407059	0.460882	0.39426
	Leaf	0.298095	0.445052	0.460457	0.352716	0.387286	0.459306	0.035998	0.046141	0.029701	0.067493	0.028085	0.031575
F5H4	Root	0.008973	0.019893	0.007524	0.005283	0.008987	0.010251	0.045351	0.053878	0.073958	0.024321	0.018487	0.046822
	Stem	0.080879	0.08246	0.074628	0.079277	0.088732	0.080879	0.001038	0.007409	0.009655	0.002564	0.001218	0.000743
	Leaf	0.050331	0.059887	0.044321	0.074211	0.074237	0.094651	0.040109	0.032195	0.035612	0.035935	0.028727	0.0324
